# Supplementary material for: Kinematic and neuromuscular responses to different visual focus conditions in stand-up paddleboarding
Source: PeerJ. 2025 Apr 23;13:e19362. doi: 10.7717/peerj.19362 (PMC12032954; doi:10.7717/peerj.19362)
Supplement: Supplemental Information 1 [file peerj-13-19362-s001.xlsx]

## Sheet: data_2
ID	Vmed_1	Vmed_2	Vmed_3	Frequency_1	Frequency_2	Frequency_3	StrokeCycle_1	Stroke_Cycle_2	StrokeCycle_3	StrokeIndex_1	StrokIndex_2	StrokeIndex_3	RPL.UpperTrap_1	RPL.UpperTrap_2	RPL.UpperTrap_3	RPR.UpperTrap_1	RPR.UpperTrap_2	RPR.UpperTrap_3	RPL.Lat.Triceps_1	RPL.Lat.Triceps_2	RPL.Lat.Triceps_3	RPR.Lat.Triceps_1	RPR.Lat.Triceps_2	RPR.Lat.Triceps_3	RPL.BicepsBr_1	RPL.BicepsBr_2	RPL.BicepsBr_3	RPR.BicepsBr_1	RPR.BicepsBr_2	RPR.BicepsBr_3	RPL.Tib.Ant_1	RPL.Tib.Ant_2	RPL.Tib.Ant_3	RPR.Tib.Ant_1	RPR.Tib.Ant_2	RPR.Tib.Ant_3	RPL.Med.Gastro_1	RPL.Med.Gastro_2	RPL.Med.Gastro_3	RPR.Med.Gastro_1	RPR.Med.Gastro_2	RPR.Med.Gastro_3	RRL.UpperTrap_1	RRL.UpperTrap_2	RRL.UpperTrap_3	RRR.UpperTrap_1	RRR.UpperTrap_2	RRR.UpperTrap_3	RRL.Lat.Triceps_1
1	0.5	0.53	0.92	0.35	0.28	0.42	1.44	1.92	2.17	0.72	1.02	1.99	5.36	6.9	9.82	6.65	6.58	8.38	4.26	4.55	5.91	3.84	4.22	4.36	3.15	2.89	2.41	5.06	4.55	6.08	4.8	5.65	4.18	5.46	5.65	3.3	5.3	3.74	4.2	6.64	3.67	5.9	4.89	3.17	5.9	7.93	8.09	6.52	5.74
2	1.03	1.06	1.48	0.58	0.45	0.95	1.76	2.33	1.56	1.81	2.46	2.31	12.73	13.19	29.56	16.85	15.63	14.33	24.57	27.99	19.92	22.45	25.83	18.66	14.16	13.88	14.06	6.77	6.76	8.33	5.18	7.92	6.93	8.6	17.2	8.48	11.81	9.39	18.97	12.66	13.19	8.6	14.14	17.04	14.61	15.44	13.3	5.19	25.55
3	0.9	0.99	1.3	0.52	0.56	0.65	1.73	1.77	1.99	1.56	1.74	2.58	15.05	16.34	18.23	5.38	14.09	5.34	8.99	7.13	7.6	9.36	12.72	5.77	6.06	7.12	5.81	2.1	3.44	4.23	14.8	11.94	9.25	8.41	15.13	5.95	13.83	8.19	9.27	2.61	4.51	3.37	7.72	7.27	9.35	4.64	11.6	2.69	23.5
4	0.91	0.97	1.27	0.51	0.51	0.69	1.78	1.89	1.84	1.62	1.83	2.34	20.66	22.46	24.64	20.85	15.34	17.49	11.7	13.45	11.68	14.38	26.85	8.49	14.61	15.1	7.69	12.28	9.39	12.94	13.32	9.15	11.4	24.75	22.48	11.29	14.34	12.77	13.79	16.49	16.04	13.25	21.68	19.41	22.74	21.52	20.48	18.36	21.13
5	0.71	0.84	1.03	0.43	0.37	0.56	1.66	2.25	1.84	1.18	1.89	1.9	13.58	18.93	20.04	14.91	20.25	10.9	10.06	11.27	8.63	8.86	12.2	15.96	7.31	7.91	4.05	7.91	12.85	8.97	21.43	30.07	23.89	28.88	33.57	27.99	3.42	7.91	4.27	6.23	14.8	13.57	13.31	13.76	12.12	18.71	18.3	16.1	8.02
6	0.77	0.88	0.89	0.58	0.55	0.53	1.33	1.6	1.69	1.02	1.4	1.51	20.18	20.3	25.76	5.81	14.83	12.05	2.23	6.33	4.44	4.33	12.51	10.01	2.2	6.35	5.01	3.21	2.91	6.25	4.85	9.51	8.32	3.19	6.02	4.88	18.76	15.98	14.65	12.18	9.03	13.79	20.11	28.55	21.99	7.68	19.08	10.05	4.07
7	0.95	0.8	1.11	0.54	0.45	0.69	1.77	1.76	1.61	1.69	1.41	1.79	22	23.95	23.91	10.11	10.2	5.73	9.03	11.9	4.32	10.38	6.86	6.44	4.74	5.1	2.91	4.31	5.27	6.16	14.16	15.95	8.4	17.92	18.76	15.99	12.11	11.97	7.04	4.3	3.73	2.48	24.97	27.84	22.77	11.95	15.76	7.75	13.92
8	0.88	1	1.14	0.58	0.69	0.71	1.51	1.44	1.61	1.33	1.44	1.84	13.11	15.31	17.26	5.47	5.88	3.93	6.95	7.65	8.68	11.14	13.89	9.09	10.02	10.57	11.04	6.42	6.4	7.53	8.54	10.23	6.84	16.39	26.68	16.52	9.53	11.2	11.55	4.71	10.19	7.67	11.77	14.7	16.17	8.26	7.91	4.25	10.05
9	0.8	1.44	1.22	0.65	0.74	0.74	1.22	1.95	1.65	0.97	2.8	2.02	28.63	34.61	29.23	29.29	29.7	27.51	14.52	19.2	12.02	13.75	15.36	6.99	10.84	10.47	9.87	6.1	7.16	12.64	15.25	10.06	6.93	15.79	17.35	11.21	16.44	17.66	19.03	9.35	10.53	7.76	18.98	24.44	6.56	32.04	33.54	19.15	31.02
10	0.67	0.81	1.18	0.43	0.59	0.6	1.57	1.39	1.98	1.06	1.13	2.33	27.83	28.86	41.88	19	17.66	22.32	8.09	9.05	7.92	6.35	6.36	3.56	11.32	9.53	8.36	5.66	5.77	7.35	8.91	8.8	4.81	9.7	8.74	5.73	8.26	11.17	9.65	11.91	12.6	12.13	23.45	26.53	22.55	21.11	18.4	13.32	7.84
11	1.03	1.35	1.45	0.39	0.54	0.76	2.64	2.49	1.91	2.71	3.36	2.77	42.83	32.02	35.02	22.51	16.43	13.21	19.86	11.08	13.18	18.47	18.64	11.59	8.48	7.16	5.95	7.66	9.02	12.26	24.63	16.08	20.24	23.01	23.16	21.68	11.35	12.73	12.59	14.39	8.63	13.06	33.25	30.2	14.1	21.76	24.27	8.91	33.99
12	1.24	1.07	1.62	0.64	0.62	0.63	1.94	1.75	2.57	2.41	1.87	4.17	21.66	21.59	21.81	16.15	15.73	11.14	14.68	25.07	18.15	15.3	30.14	13.01	22.63	15.21	14.94	7.67	7.29	8.83	14.75	14.42	2.19	14.61	14.76	2.44	3.15	2.7	6.12	1.38	1.83	3.35	21.57	21.12	16.63	22.87	22.59	13.59	31.72
13	0.99	1	1.17	0.54	0.64	0.58	1.85	1.55	2.02	1.83	1.55	2.36	13.17	18.97	12.28	6.54	6.94	3.6	20.44	20.84	18.18	19.5	28.35	14.74	8.52	11.12	5.67	5.73	6.12	6.13	13.46	20.26	18.28	13.8	15.91	19.94	5.87	7.22	8.19	4.18	7.2	6.43	7.32	9.84	4.94	7.21	8.24	3.78	33.01
14	0.84	1	0.99	0.57	0.57	0.64	1.47	1.75	1.55	1.24	1.76	1.53	25.23	31.55	31.48	5.66	14.56	15.99	12.45	16.77	8.64	12.35	17.3	11.67	9.11	9.06	5.94	6.23	9.63	11.38	8.87	10.24	10.81	16.73	13.81	15.98	18.44	14.79	14.4	5.59	7.36	6.92	18.76	32.67	16.5	7.62	21.73	13.35	16.72
[truncated: 83 more columns]
